# Supplementary material
Source: publisher figshare collection journal article supplement (https://acs.figshare.com/ndownloader/files/25587286)
Supplement: Supplementary file 1 [file 25587286]

## Supporting Information

### Se Doping Regulates the Activity of NiTe<sub>2</sub> for Electrocatalytic Hydrogen Evolution Reaction

Qingtao Wang,<sup>\*a</sup> Yanna Huang,<sup>a</sup> Liqui Huang,<sup>a</sup> Yanxia Wu,<sup>a</sup> Shufang Ren<sup>\*b</sup>

- a Key Laboratory of Eco-functional Polymer Materials of the Ministry of Education,  
Key Laboratory of Eco-environmental Polymer Materials of Gansu Province,  
College of Chemistry and Chemical Engineering, Northwest Normal University,  
Lanzhou 730070, China. E-mail: [wangqt@nwnu.edu.cn](mailto:wangqt@nwnu.edu.cn)
- b Key Laboratory of Evidence Science Research and Application of Gansu Province,  
Gansu University of Political Science and Law, Lanzhou 730070, China. E-mail:  
[rsf@gsli.edu.cn](mailto:rsf@gsli.edu.cn)

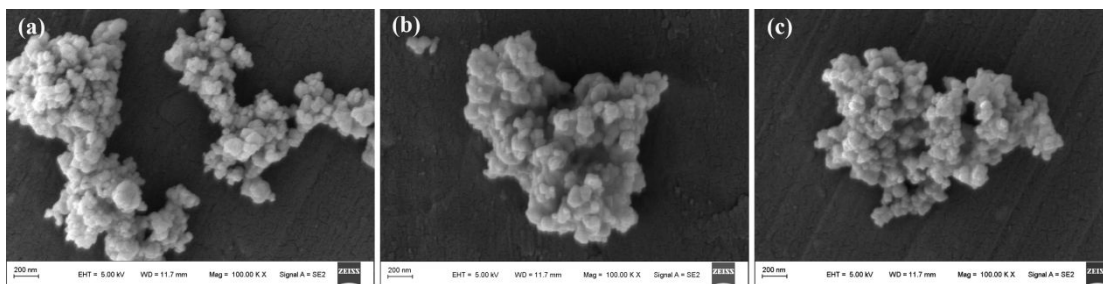

Fig. S1. SEM images of (a)  $\text{Se}_{4\%}\text{-NiTe}_2$ , (b)  $\text{Se}_{8\%}\text{-NiTe}_2$ , and (c)  $\text{Se}_{16\%}\text{-NiTe}_2$ .

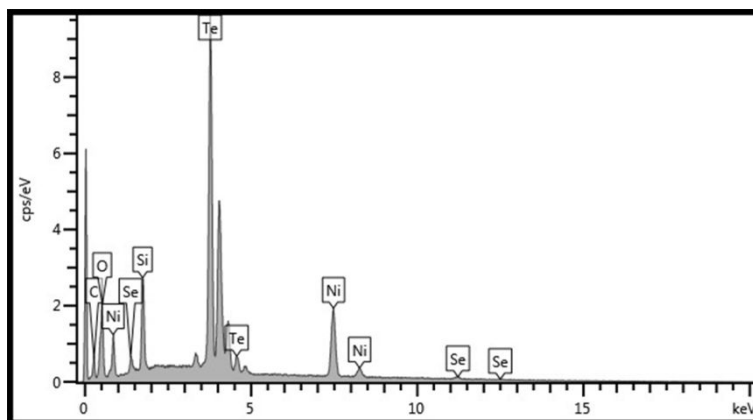

Fig. S2. EDS spectrum of  $\text{Se}_{12\%}\text{-NiTe}_2$ .

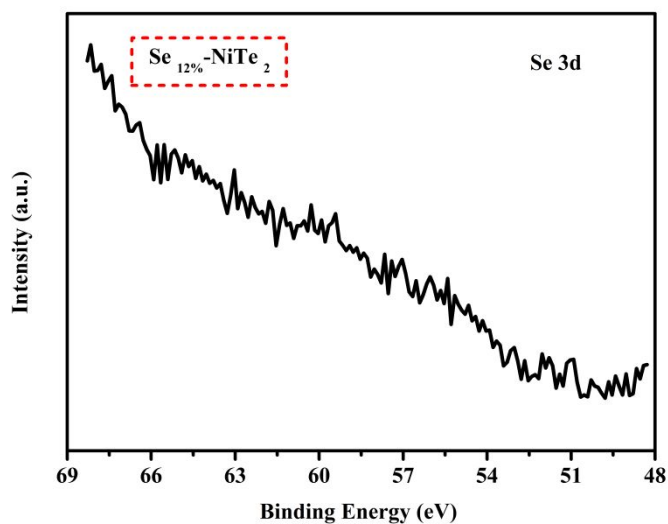

Fig. S3. High-resolution Se 3d XPS spectrum of  $\text{Se}_{12\%}\text{-NiTe}_2$ .

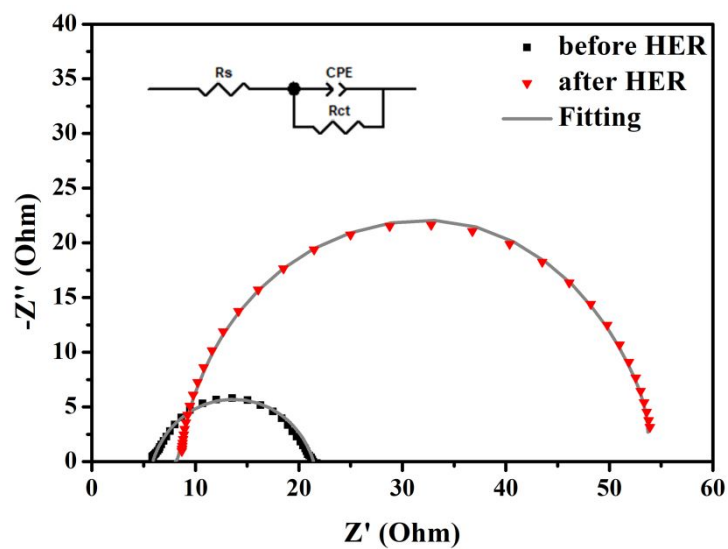

Fig. S4. Nyquist plots of  $\text{Se}_{12\%}\text{-NiTe}_2$  before and after HER.

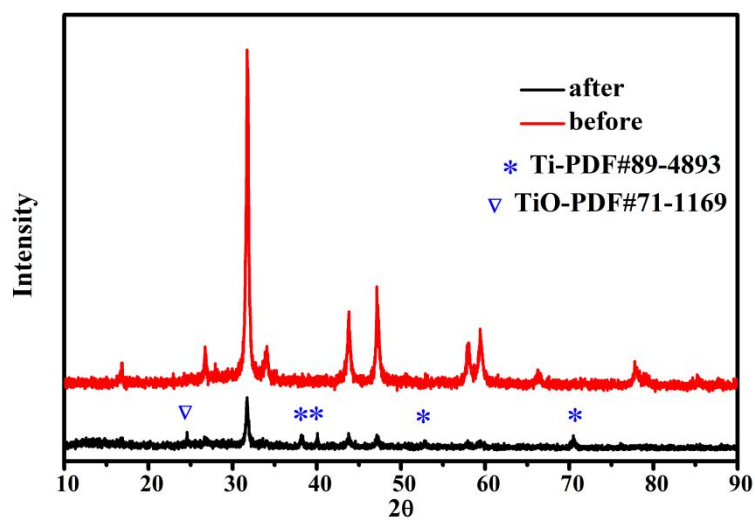

Fig. S5. XRD patterns of  $\text{Se}_{12\%}\text{-NiTe}_2$  before and after HER.

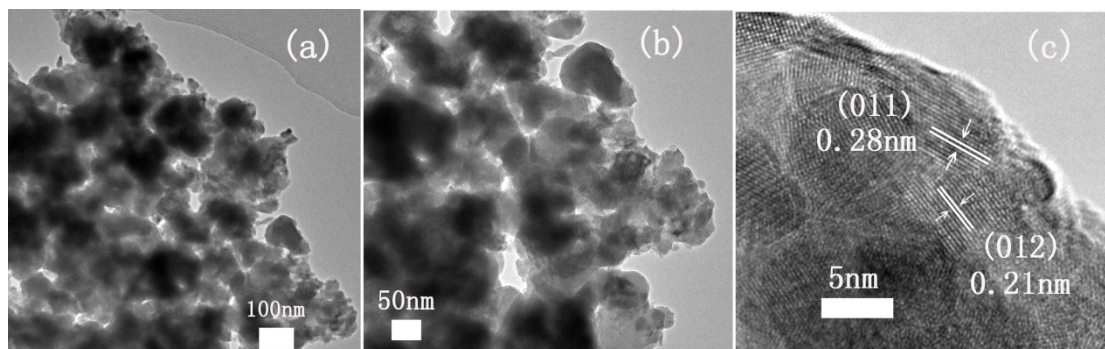

Fig. S6. TEM and HRTEM images of  $\text{Se}_{12\%}\text{-NiTe}_2$  after HER.
